# Supplementary material for: Andrographolide promotes proliferative and osteogenic potentials of human placenta-derived mesenchymal stem cells through the activation of Wnt/β-catenin signaling
Source: Stem Cell Res Ther. 2021 Apr 14;12:241. doi: 10.1186/s13287-021-02312-x (PMC8048284; doi:10.1186/s13287-021-02312-x)
Supplement: Supplementary file 1 — Additional file 1. The summary of gene enrichment analysis of the upregulated genes by AP treatment that show statistical significance (P < 0.05) compared to differentiation control performed by NanoString analysis [file 13287_2021_2312_MOESM1_ESM.xlsx]

## Sheet: Sheet1
	The summary of gene enrichment analysis of the upregulated genes by AP treatment that show statistical significance (P < 0.05) compared to differentiation control performed by NanoString analysis
		Diff + AP2.5 (n=3)		Diff control (n=3)
	Probe Name	Mean	SEM	Mean	SEM	Fold change	P value	Accession #	Species Name	Target Sequence
1	ABL1-mRNA	894.51	10.5655	763.47	10.24	1.17	0.00078161	NM_005157.3	Homo sapiens (Hs)	CTGCGTGAGCTATGTGGATTCCATCCAGCAAATGAGGAACAAGTTTGCCTTCCGAGAGGCCATCAACAAACTGGAGAATAATCTCCGGGAGCTTCAGATC
2	BDNF-mRNA	187.08	12.6209	132.55	14.62	1.41	0.0220582	NM_170732.4	Homo sapiens (Hs)	CAGGGTGATGCTCAGTAGTCAAGTGCCTTTGGAGCCTCCTCTTCTCTTTCTGCTGGAGGAATACAAAAATTACCTAGATGCTGCAAACATGTCCATGAGG
3	BMP6-mRNA	317.35	36.8061	159.54	15.25	5.33	0.00085909	NM_001718.2	Homo sapiens (Hs)	CCTGTTTTTGTTGGACACCCGTGTAGTATGGGCCTCAGAAGAAGGCTGGCTGGAATTTGACATCACGGCCACTAGCAATCTGTGGGTTGTGACTCCACAG
4	CACNA2D1-mRNA	709.28	38.9019	429.26	35.71	1.65	0.00248597	NM_000722.2	Homo sapiens (Hs)	TCCCTTCGGCCGTCACTATCAAATCATGGGTGGATAAGATGCAAGAAGACCTTGTCACACTGGCAAAAACAGCAAGTGGAGTCAATCAGCTTGTTGATAT
5	COL1A1-mRNA	15592.5	229.774	9247.7	187.94	1.69	1.482e-05	NM_000088.3	Homo sapiens (Hs)	CAGAAACATCGGATTTGGGGAACGCGTGTCAATCCCTTGTGCCGCAGGGCTGGGCGGGAGAGACTGTTCTGTTCCTTGTGTAACTGTGTTGCTGAAAGAC
6	COL1A2-mRNA	5240.18	65.968	2908.19	144.46	1.8	0.00051877	NM_000089.3	Homo sapiens (Hs)	CCAATGGATTTGCTGGTCCTGCTGGTGCTGCTGGTCAACCTGGTGCTAAAGGAGAAAGAGGAGCCAAAGGGCCTAAGGGTGAAAACGGTGTTGTTGGTCC
7	COL5A1-mRNA	10710.1	200.144	7399.44	164.04	1.45	0.00019677	NM_000093.3	Homo sapiens (Hs)	GTAAAGGTCATCCCACCATCACCAAAGCCTCCGTTTTTAACAACCTCCAACACGATCCATTTAGAGGCCAAATGTCATTCTGCAGGTGCCTTCCCGATGG
8	COL5A2-mRNA	7094.28	51.7133	5849.45	371.18	1.21	0.0289797	NM_000393.3	Homo sapiens (Hs)	GGTTCATGCTACCCTGAAGTCACTCAGTAGTCAGATTGAAACCATGCGCAGCCCCGATGGCTCGAAAAAGCACCCAGCCCGCACGTGTGATGACCTAAAG
9	CREB3L1-mRNA	1596.35	14.4049	867.9	24.9	1.84	4.947e-05	NM_052854.1	Homo sapiens (Hs)	CAACAATGCGCACTTTCCTGAGCACCTGGACCACTTTACGGAGAACATGGAGGACTTCTCCAATGACCTGTTCAGCAGCTTCTTTGATGACCCTGTGCTG
10	CTNNB1-mRNA	3783	54.3402	3319.59	44.58	1.14	0.00382578	NM_001904.3	Homo sapiens (Hs)	GCCACAAGATTACAAGAAACGGCTTTCAGTTGAGCTGACCAGCTCTCTCTTCAGAACAGAGCCAATGGCTTGGAATGAGACTGCTGATCTTGGACTTGAT
11	DAXX-mRNA	523.54	14.9938	401.86	22.35	1.3	0.00364107	NM_001350.3	Homo sapiens (Hs)	CTCTTCCAGGAAGCAATCAGAGGAGCCCTTCACCACTGTCTTAGAGAATGGAGCAGGCATGGTCTCTTCTACTTCCTTCAATGGAGGCGTCTCTCCTCAC
12	DDIT4-mRNA	225.39	26.7486	161.11	12.49	1.4	0.0250904	NM_019058.2	Homo sapiens (Hs)	CCCATTCAAGCGGCAGGACGCACTTGTCTTAGCAGTTCTCGCTGACCGCGCTAGCTGCGGCTTCTACGCTCCGGCACTCTGAGTTCATCAGCAAACGCCC
13	EIF4EBP1-mRNA	281.74	0.987269	235.12	9.07	1.2	0.0134114	NM_004095.3	Homo sapiens (Hs)	CTGCGCAATAGCCCAGAAGATAAGCGGGCGGGCGGTGAAGAGTCACAGTTTGAGATGGACATTTAAAGCACCAGCCATCGTGTGGAGCACTACCAAGGGG
14	FGF2-mRNA	1943.94	15.1728	1421.03	38.74	1.37	0.00044243	NM_002006.4	Homo sapiens (Hs)	GTCCGGGAGAAGAGCGACCCTCACATCAAGCTACAACTTCAAGCAGAAGAGAGAGGAGTTGTGTCTATCAAAGGAGTGTGTGCTAACCGTTACCTGGCTA
15	FGF7-mRNA	2714.07	138.01	1437.63	114.06	1.89	0.00083489	NM_002009.3	Homo sapiens (Hs)	GAAAGGCTCAAGTTGCACCAGGCAGACAACAGACATGGAATTCTTATATATCCAGCTGTTAGCAACAAAACAAAAGTCAAATAGCAAACAGCGTCACAGC
16	FLNA-mRNA	5772.75	50.3449	4065.58	175.3	1.42	0.00232947	NM_001456.3	Homo sapiens (Hs)	CCCTCAGGAGCCCTGGAGGAGTGCTATGTCACAGAAATTGACCAAGATAAGTATGCTGTGCGCTTCATCCCTCGGGAGAATGGCGTTTACCTGATTGACG
17	FLT1-mRNA	867.32	14.9938	171.2	37.89	5.07	0.00483129	NM_002019.4	Homo sapiens (Hs)	AAGAAATGGCAAACAATTCTGCAGTACTTTAACCTTGAACACAGCTCAAGCAAACCACACTGGCTTCTACAGCTGCAAATATCTAGCTGTACCTACTTCA
18	FST-mRNA	491.76	7.67299	213	9.95	2.31	7.507e-05	NM_006350.2	Homo sapiens (Hs)	GACCAATAATGCCTACTGTGTGACCTGTAATCGGATTTGCCCAGAGCCTGCTTCCTCTGAGCAATATCTCTGTGGGAATGATGGAGTCACCTACTCCAGT
19	GAS1-mRNA	803.62	15.6924	445.86	16.62	1.8	3.871e-05	NM_002048.2	Homo sapiens (Hs)	CTGTGGCTTGGGACAGATAGAAGGGATGGTTGGGGATACTTCCCAAAACTTTTTCCAAGTCAACTTGGTGTAGCCGGTTCCCCGGCCACGACTCTGGGCA
20	HSP90B1-mRNA	1464.6	22.2799	1285.09	65.65	1.14	0.0289914	NM_003299.1	Homo sapiens (Hs)	TCAGAGCTGACGATGAAGTTGATGTGGATGGTACAGTAGAAGAGGATCTGGGTAAAAGTAGAGAAGGATCAAGGACGGATGATGAAGTAGTACAGAGAGA
21	ID1-mRNA	947.97	25.9692	728.75	83.84	1.3	0.0393737	NM_002165.2	Homo sapiens (Hs)	CTGCCCCAGAACCGCAAGGTGAGCAAGGTGGAGATTCTCCAGCACGTCATCGACTACATCAGGGACCTTCAGTTGGAGCTGAACTCGGAATCCGAAGTTG
22	ID2-mRNA	1331.98	9.3473	651.7	26.44	2.04	0.00045026	NM_002166.4	Homo sapiens (Hs)	CGGATATCAGCATCCTGTCCTTGCAGGCTTCTGAATTCCCTTCTGAGTTAATGTCAAATGACAGCAAAGCACTGTGTGGCTGAATAAGCGGTGTTCATGA
23	ID4-mRNA	309.6	10.2595	216.57	15.36	1.43	0.00267052	NM_001546.2	Homo sapiens (Hs)	GCTTGCTACCAAAGGACAAACTCTTGGAAATGAACACTTTCTGCTTTCCTTCCTCCAAAGAATTAATAGGCAACAGTGGGAGAAAAAAAAGGCATAATGG
24	IGF1R-mRNA	12293.9	951.161	6899.24	537.7	1.78	0.00681656	NM_000598.4	Homo sapiens (Hs)	TATCAAAATATTCAGAGACTCGAGCACAGCACCCAGACTTCATGCGCCCGTGGAATGCTCACCACATGTTGGTCGAAGCGGCCGACCACTGACTTTGTGA
25	JUN-mRNA	358.66	6.34508	259.29	46.58	1.38	0.0792626	NM_002228.3	Homo sapiens (Hs)	ACACAGCCAGCCAGCCAGGTCGGCAGTATAGTCCGAACTGCAAATCTTATTTTCTTTTCACCTTCTCTCTAACTGCCCAGAGCTAGCGCCTGTGGCTCCC
26	LIFR-mRNA	154.42	0.964175	122.17	6.53	1.26	0.0137703	NM_002310.3	Homo sapiens (Hs)	CCTATTGTCCACCCATCATTGAGGAAGAAATACCAAACCCAGCCGCAGATGAAGCTGGAGGGACTGCACAGGTTATTTACATTGATGTTCAGTCGATGTA
27	LTBP1-mRNA	1529.26	35.5532	1391.11	65.43	1.1	0.0470959	NM_000627.3	Homo sapiens (Hs)	TACGGCCAAGATGACCTGTGTCGATGTAAATGAATGCGATGAGTTGAACAACCGGATGTCTCTCTGCAAGAATGCCAAGTGCATTAACACCGATGGTTCC
28	NOTCH2-mRNA	693.03	9.23183	387.76	13.62	1.79	6.232e-05	NM_024408.3	Homo sapiens (Hs)	AAGAGTCACCAAATTTTGAGAGTTATACTTGCTTGTGTGCTCCTGGCTGGCAAGGTCAGCGGTGTACCATTGACATTGACGAGTGTATCTCCAAGCCCTG
29	PLD1-mRNA	327.56	10.0863	250.48	15.6	1.31	0.00506996	NM_002662.3	Homo sapiens (Hs)	AGTCCAGAAATCTTCCTGAAACGCCCAGTGGTTGAGGGAAATCGTTGGAGGTTGGACTGCATTCTTAAACGAAAAGCACAACAAGGAGTGAGGATCTTCA
30	SFRP1-mRNA	758.73	3.27935	463.13	53.76	1.64	0.0167524	NM_003012.3	Homo sapiens (Hs)	CAGAGTCCTTAGTGGAGGGGTTTACCTGGAACATTAGTAGTTACCACAGAATACGGAAGAGCAGGTGACTGTGCTGTGCAGCTCTCTAAATGGGAATTCT
31	SMAD2-mRNA	333.09	9.91888	211.64	9.76	1.07	0.0399998	NM_001003652.1	Homo sapiens (Hs)	AGATGAGTAATATTTTTTCCAGTAGGTTCCACAGAGACACCTTGGGGGCTGGCTTAGGGGAGGCTGTTGGAGTTCTCACTGACTTAGTGGCATATTTATT
32	SMAD3-mRNA	170.12	5.8832	139.64	8.8	1.22	0.0166965	NM_005902.3	Homo sapiens (Hs)	TTAAAGGACAGTTGAAAAGGGCAAGAGGAAACCAGGGCAGTTCTAGAGGAGTGCTGGTGACTGGATAGCAGTTTTAAGTGGCGTTCACCTAGTCAACACG
33	STAT3-mRNA	1589.82	3.8567	1497.79	31.72	1.06	0.035101	NM_139276.2	Homo sapiens (Hs)	AGACTTGGGCTTACCATTGGGTTTAAATCATAGGGACCTAGGGCGAGGGTTCAGGGCTTCTCTGGAGCAGATATTGTCAAGTTCATGGCCTTAGGTAGCA
34	TGFB1-mRNA	868.13	42.8625	729.02	56.82	1.19	0.0410455	NM_000660.3	Homo sapiens (Hs)	TATATGTTCTTCAACACATCAGAGCTCCGAGAAGCGGTACCTGAACCCGTGTTGCTCTCCCGGGCAGAGCTGCGTCTGCTGAGGCTCAAGTTAAAAGTGG
35	TGFB3-mRNA	192.44	2.59808	142.2	22.85	1.35	0.0319504	NM_003239.2	Homo sapiens (Hs)	CCCTCGATCATATTTCCCCTTGGACACTTGGTTAGACGCCTTCCAGGTCAGGATGCACATTTCTGGATTGTGGTTCCATGCAGCCTTGGGGCATTATGGG
36	VEGFA-mRNA	1451.3	27.401	1087.2	79.3	1.33	0.00947063	NM_001025366.1	Homo sapiens (Hs)	GAGTCCAACATCACCATGCAGATTATGCGGATCAAACCTCACCAAGGCCAGCACATAGGAGAGATGAGCTTCCTACAGCACAACAAATGTGAATGCAGAC
